# Supplementary material for: Mechanism of antibody-specific deglycosylation and immune evasion by Streptococcal IgG-specific endoglycosidases
Source: PubMed Central journal article supplement (PMC10042849; doi:10.1038/s41467-023-37215-3), 2023-03-27
Supplement: 41467_2023_37215_MOESM6_ESM.pdf [file 41467_2023_37215_MOESM6_ESM.pdf]

## Reporting Summary

Nature Portfolio wishes to improve the reproducibility of the work that we publish. This form provides structure for consistency and transparency in reporting. For further information on Nature Portfolio policies, see our [Editorial Policies](#) and the [Editorial Policy Checklist](#).

### Statistics

For all statistical analyses, confirm that the following items are present in the figure legend, table legend, main text, or Methods section.

| n/a                                 | Confirmed                                                                                                                                                                                                                                                                                      |
|-------------------------------------|------------------------------------------------------------------------------------------------------------------------------------------------------------------------------------------------------------------------------------------------------------------------------------------------|
| <input type="checkbox"/>            | <input checked="" type="checkbox"/> The exact sample size ( $n$ ) for each experimental group/condition, given as a discrete number and unit of measurement                                                                                                                                    |
| <input type="checkbox"/>            | <input checked="" type="checkbox"/> A statement on whether measurements were taken from distinct samples or whether the same sample was measured repeatedly                                                                                                                                    |
| <input type="checkbox"/>            | <input checked="" type="checkbox"/> The statistical test(s) used AND whether they are one- or two-sided<br><i>Only common tests should be described solely by name; describe more complex techniques in the Methods section.</i>                                                               |
| <input checked="" type="checkbox"/> | <input type="checkbox"/> A description of all covariates tested                                                                                                                                                                                                                                |
| <input checked="" type="checkbox"/> | <input type="checkbox"/> A description of any assumptions or corrections, such as tests of normality and adjustment for multiple comparisons                                                                                                                                                   |
| <input type="checkbox"/>            | <input checked="" type="checkbox"/> A full description of the statistical parameters including central tendency (e.g. means) or other basic estimates (e.g. regression coefficient) AND variation (e.g. standard deviation) or associated estimates of uncertainty (e.g. confidence intervals) |
| <input type="checkbox"/>            | <input checked="" type="checkbox"/> For null hypothesis testing, the test statistic (e.g. $F$ , $t$ , $r$ ) with confidence intervals, effect sizes, degrees of freedom and $P$ value noted<br><i>Give <math>P</math> values as exact values whenever suitable.</i>                            |
| <input checked="" type="checkbox"/> | <input type="checkbox"/> For Bayesian analysis, information on the choice of priors and Markov chain Monte Carlo settings                                                                                                                                                                      |
| <input checked="" type="checkbox"/> | <input type="checkbox"/> For hierarchical and complex designs, identification of the appropriate level for tests and full reporting of outcomes                                                                                                                                                |
| <input checked="" type="checkbox"/> | <input type="checkbox"/> Estimates of effect sizes (e.g. Cohen's $d$ , Pearson's $r$ ), indicating how they were calculated                                                                                                                                                                    |

*Our web collection on [statistics for biologists](#) contains articles on many of the points above.*

### Software and code

Policy information about [availability of computer code](#)

|                 |                                                                                                                                                                                                                                                           |
|-----------------|-----------------------------------------------------------------------------------------------------------------------------------------------------------------------------------------------------------------------------------------------------------|
| Data collection | Agilent 1290 Infinity II LC System equipped with a 50 mm PLRP-S column from Agilent with 1000 Å pore size. The LC system is attached to an Agilent 6560 Ion Mobility (IM) quadrupole- time of flight (Q-TOF) mass spectrometer (Agilent, Santa Clara, CA) |
| Data analysis   | cryosparc v3.2.0<br>relion 3.1.2<br>phenix-1.18.2-3874<br>coot 0.8.9.2<br>UCSF Chimera 1.14<br>UCSF ChimeraX 1.3<br>pymol V_2.5<br>TITAN v1.6-12-g9041<br>Matlab R2019b<br>CCPNMR Analysis v2.4.2.<br>TopSpin 4.0.6                                       |

For manuscripts utilizing custom algorithms or software that are central to the research but not yet described in published literature, software must be made available to editors and reviewers. We strongly encourage code deposition in a community repository (e.g. GitHub). See the Nature Portfolio [guidelines for submitting code & software](#) for further information.

## Data

Policy information about [availability of data](#)

All manuscripts must include a [data availability statement](#). This statement should provide the following information, where applicable:

- Accession codes, unique identifiers, or web links for publicly available datasets
- A description of any restrictions on data availability
- For clinical datasets or third party data, please ensure that the statement adheres to our [policy](#)

The atomic coordinates of EndoSE235A-Fc have been deposited in the Protein Data Bank (PDB) under the accession code 8A64 [<http://doi.org/10.2210/pdb8A64/pdb>], and the cryoEM map are deposited in the Electron Microscopy Data Bank (EMDB) under the accession code EMD-15205 [<https://www.ebi.ac.uk/pdbe/entry/emdb/EMD-15205>]. Previously published PDB structures used in this study are available under the accession codes: 6MDS [<http://doi.org/10.2210/pdb6MDS/pdb>], 4NUY [<http://doi.org/10.2210/pdb4NUY/pdb>], 2DTS [<http://doi.org/10.2210/pdb2DTS/pdb>], 1H3X [<http://doi.org/10.2210/pdb1H3X/pdb>] and 6EN3 [<http://doi.org/10.2210/pdb6EN3/pdb>]. All other data are available from the corresponding authors upon request. Source data are provided with this paper.

## Human research participants

Policy information about [studies involving human research participants and Sex and Gender in Research](#).

|                             |                                                                  |
|-----------------------------|------------------------------------------------------------------|
| Reporting on sex and gender | <input type="text" value="This is not relevant for this study"/> |
| Population characteristics  | <input type="text" value="This is not relevant for this study"/> |
| Recruitment                 | <input type="text" value="This is not relevant for this study"/> |
| Ethics oversight            | <input type="text" value="This is not relevant for this study"/> |

Note that full information on the approval of the study protocol must also be provided in the manuscript.

## Field-specific reporting

Please select the one below that is the best fit for your research. If you are not sure, read the appropriate sections before making your selection.

- Life sciences       Behavioural & social sciences       Ecological, evolutionary & environmental sciences

For a reference copy of the document with all sections, see [nature.com/documents/nr-reporting-summary-flat.pdf](https://www.nature.com/documents/nr-reporting-summary-flat.pdf)

## Life sciences study design

All studies must disclose on these points even when the disclosure is negative.

|                 |                                                                                                                                                           |
|-----------------|-----------------------------------------------------------------------------------------------------------------------------------------------------------|
| Sample size     | <input type="text" value="We performed the experiments in duplicates or triplicates. We have included this information in the relevant figure legends."/> |
| Data exclusions | <input type="text" value="No data excluded from the activity and binding experiments"/>                                                                   |
| Replication     | <input type="text" value="We performed the experiments in duplicates or triplicates. All the activity and binding experiments were reproducible"/>        |
| Randomization   | <input type="text" value="This is not relevant for this study because we did not need to prevent bias in our activity and binding experiments"/>          |
| Blinding        | <input type="text" value="This is not relevant for this study because we did not need to prevent bias in our activity and binding experiments"/>          |

## Reporting for specific materials, systems and methods

We require information from authors about some types of materials, experimental systems and methods used in many studies. Here, indicate whether each material, system or method listed is relevant to your study. If you are not sure if a list item applies to your research, read the appropriate section before selecting a response.

## Materials &amp; experimental systems

| n/a                                 | Involvement                                               |
|-------------------------------------|-----------------------------------------------------------|
| <input type="checkbox"/>            | <input checked="" type="checkbox"/> Antibodies            |
| <input type="checkbox"/>            | <input checked="" type="checkbox"/> Eukaryotic cell lines |
| <input checked="" type="checkbox"/> | <input type="checkbox"/> Palaeontology and archaeology    |
| <input checked="" type="checkbox"/> | <input type="checkbox"/> Animals and other organisms      |
| <input checked="" type="checkbox"/> | <input type="checkbox"/> Clinical data                    |
| <input checked="" type="checkbox"/> | <input type="checkbox"/> Dual use research of concern     |

## Methods

| n/a                                 | Involvement                                     |
|-------------------------------------|-------------------------------------------------|
| <input checked="" type="checkbox"/> | <input type="checkbox"/> ChIP-seq               |
| <input checked="" type="checkbox"/> | <input type="checkbox"/> Flow cytometry         |
| <input checked="" type="checkbox"/> | <input type="checkbox"/> MRI-based neuroimaging |

## Antibodies

|                 |                                                                                                                                                        |
|-----------------|--------------------------------------------------------------------------------------------------------------------------------------------------------|
| Antibodies used | Rituximab (RITUXAN, Genentech) was kindly provided courtesy of the University of Maryland Greenebaum Comprehensive Cancer Center. No catalogue number. |
| Validation      | We did not need to validate the antibody because our experiments are focus on the Fc region.                                                           |

## Eukaryotic cell lines

Policy information about [cell lines and Sex and Gender in Research](#)

|                                                                      |                                                                                                 |
|----------------------------------------------------------------------|-------------------------------------------------------------------------------------------------|
| Cell line source(s)                                                  | HEK293T (ATTC, cat. No.: CRL-3216) and Expi293 (ThermoFisher Scientific, cat.No.: A14527) cells |
| Authentication                                                       | None of the cell used were authenticated                                                        |
| Mycoplasma contamination                                             | No                                                                                              |
| Commonly misidentified lines<br>(See <a href="#">ICLAC</a> register) | N/A                                                                                             |
